# Supplementary material
Source: PubMed Central journal article supplement (PMC4767543)

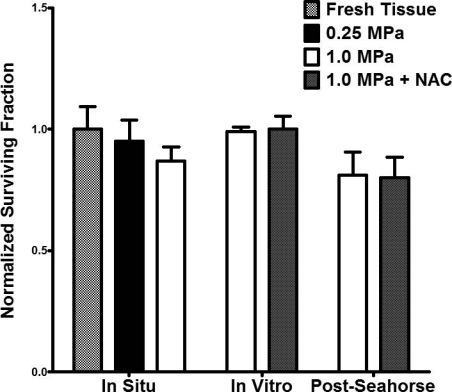

Control

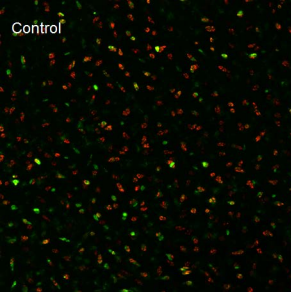

FCCP

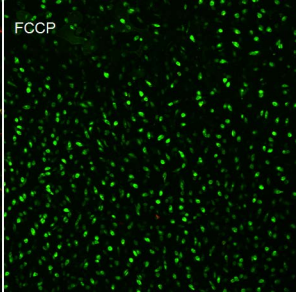

Supplement: NIHMS730010-supplement-Supp_FigureS1-S2.pdf [file NIHMS730010-supplement-Supp_FigureS1-S2.pdf]
